# Supplementary material
Source: PubMed Central journal article supplement (PMC2772662)

A

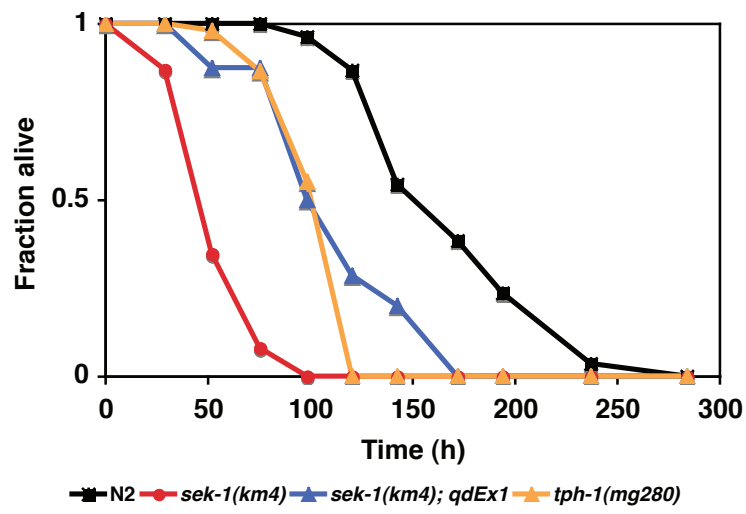

B

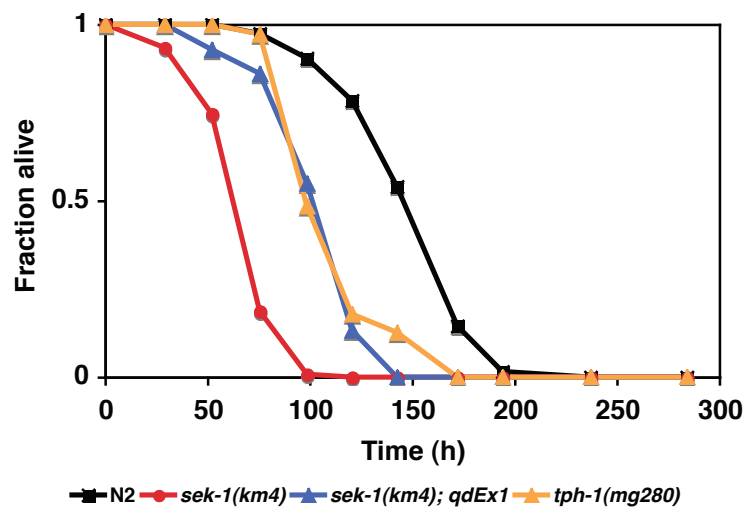

Figure S1.

A

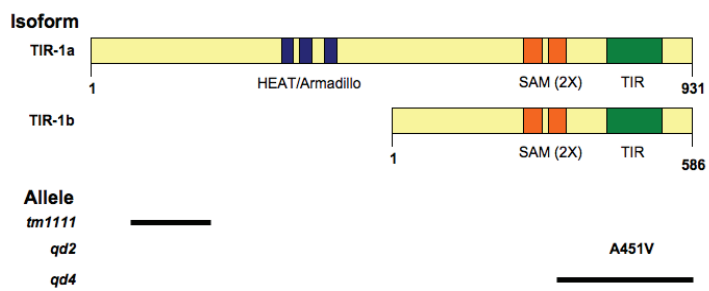

B

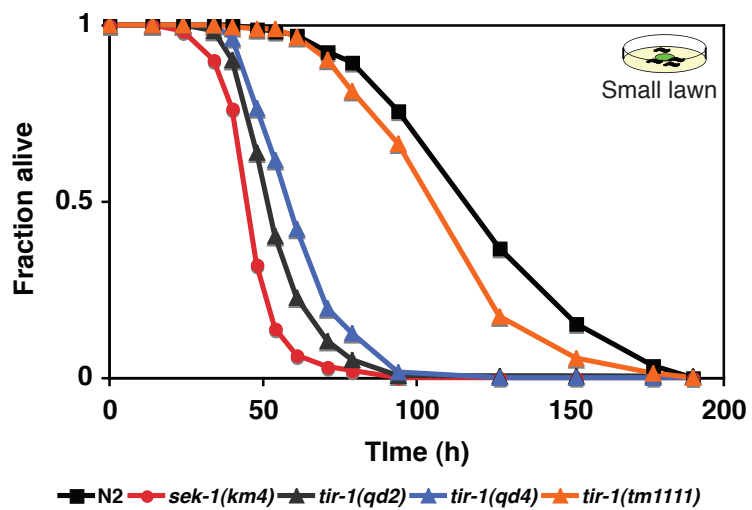

C

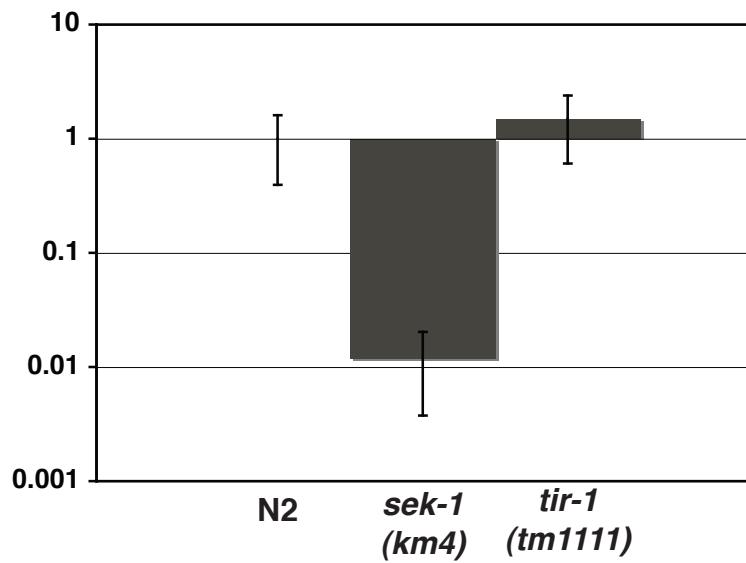

Figure S2.

Supplement: NIHMS146743-supplement-01.pdf [file NIHMS146743-supplement-01.pdf]
